# Supplementary material for: Hindered rotation in a novel 1,2,4-triazinyl phenanthroline (t-phen) ligand leading to improved separation of Am3+ and Eu3+vis-à-vis 1,2,4-triazinyl bipyridine (t-bipy): a computational validation of the experimental results
Source: Royal Society of Chemistry journal article supplement (doi:10.1039/c2ra00445c), 2012-01-01
Supplement: c2ra00445c.pdf [file c2ra00445c.pdf]

**Hindered rotation in a Novel 1,2,4-triazinyl phenanthroline (t-phen) Ligand Leading to Improved Separation of Am<sup>3+</sup> and Eu<sup>3+</sup> vis-a-vis 1,2,4-triazinyl bipyridine (t-bipy): A Computational Validation of the Experimental Results**

Arunasis Bhattacharyya, Trilochan Gadly, Prasanta Kumar Mohapatra, Sunil Kumar Ghosh, Debashree Manna, Tapan Kumar Ghanty and Vijay Kumar Manchanda

**Optimized geometries of the free ligands and their complexes with Am<sup>3+</sup>, Eu<sup>3+</sup> and H<sup>+</sup> (Values are in Ang)**

**Me<sub>2</sub>(t-bipy) (optimized at HF-level)**

| ATOM | X             | Y             | Z             |
|------|---------------|---------------|---------------|
| H    | -5.8568092865 | 2.4848256417  | -0.0500925876 |
| C    | -4.9970182658 | 1.8408811492  | -0.0262780702 |
| C    | -5.1492929494 | 0.4669391965  | 0.0151541630  |
| N    | -4.1349221668 | -0.3756038706 | 0.0457463069  |
| C    | -2.9031257871 | 0.1090992400  | 0.0366905922  |
| C    | -2.6398129940 | 1.4748050351  | -0.0039891475 |
| C    | -3.7087931722 | 2.3483994317  | -0.0358574740 |
| H    | -6.1322546618 | 0.0274596394  | 0.0240549694  |
| C    | -1.7867710865 | -0.8823411616 | 0.0723688750  |
| H    | -1.6247173445 | 1.8181179141  | -0.0097180938 |
| H    | -3.5396319641 | 3.4104836371  | -0.0677104587 |
| C    | -2.0395660322 | -2.2494794968 | 0.1116512164  |
| C    | -0.9604465873 | -3.1101182509 | 0.1431473071  |
| C    | 0.3234868846  | -2.5967924323 | 0.1349743671  |
| C    | 0.4705135678  | -1.2162928169 | 0.0948191266  |
| N    | -0.5600611644 | -0.3944581912 | 0.0646522224  |
| H    | -3.0500366643 | -2.6050947429 | 0.1167380603  |
| H    | -1.1163433866 | -4.1739737639 | 0.1739409497  |
| H    | 1.1866529146  | -3.2306619465 | 0.1585914262  |
| C    | 1.8315959113  | -0.5974677307 | 0.0842992912  |
| N    | 2.8509923403  | -1.4109018810 | 0.1126980186  |
| N    | 4.0669807751  | -0.9150965324 | 0.1053181283  |
| C    | 4.2495077534  | 0.3726102535  | 0.0701223722  |
| C    | 3.1253260785  | 1.2369055524  | 0.0395338736  |
| N    | 1.9278315989  | 0.7352093034  | 0.0470735880  |
| C    | 5.6660897173  | 0.8749169945  | 0.0640300128  |
| C    | 3.2732478578  | 2.7315174664  | -0.0014334929 |
| H    | 2.2935802535  | 3.1862752699  | -0.0235998987 |
| H    | 3.8129956900  | 3.0911296040  | 0.8693566802  |
| H    | 3.8300018265  | 3.0419054593  | -0.8803549899 |
| H    | 5.8644500733  | 1.5081626985  | 0.9236694487  |
| H    | 6.3399476922  | 0.0303874332  | 0.0914176577  |
| H    | 5.8743768679  | 1.4592229077  | -0.8273282435 |

**Me<sub>2</sub>(t-phen) (optimized at HF-level)**

| ATOM | X             | Y             | Z             |
|------|---------------|---------------|---------------|
| N    | 2.3669572429  | -0.7872559748 | -0.1262806781 |
| C    | 2.1482513818  | 0.5303400044  | -0.0897665245 |
| N    | 3.0861917003  | 1.4357621939  | -0.0740209411 |
| N    | 4.3445097826  | 1.0556018180  | -0.0953097593 |
| C    | 4.6444028505  | -0.2092106937 | -0.1315304965 |
| C    | 3.6043499743  | -1.1756538833 | -0.1475262792 |
| C    | 0.7346480602  | 1.0204324939  | -0.0644456359 |
| C    | 0.4764820208  | 2.4067319318  | -0.0126695800 |
| C    | -0.8216796262 | 2.8158517748  | 0.0093586320  |
| C    | -1.8560414673 | 1.8633412822  | -0.0202516500 |
| C    | -1.4872251333 | 0.5136924238  | -0.0716016499 |
| N    | -0.2084480507 | 0.1255778768  | -0.0921083390 |
| C    | -3.2442127521 | 2.2392013843  | 0.0005782630  |
| C    | -4.2055668639 | 1.3056725731  | -0.0289035797 |
| C    | -3.8733744430 | -0.0937305635 | -0.0822208494 |
| C    | -2.5334731736 | -0.5033402735 | -0.1039694159 |
| C    | -4.8632530101 | -1.0923550680 | -0.1142218841 |
| C    | -4.4901900467 | -2.4028153067 | -0.1646031790 |
| C    | -3.1170867897 | -2.6973368086 | -0.1824221007 |
| N    | -2.1818832935 | -1.7946905430 | -0.1535867260 |
| C    | 6.1010458814  | -0.5788260778 | -0.1538009357 |
| C    | 3.8873041285  | -2.6505855741 | -0.1886624435 |
| H    | -5.2146219044 | -3.1959736401 | -0.1903051792 |
| H    | -2.7913738451 | -3.7236288642 | -0.2222094112 |
| H    | -5.9023410070 | -0.8118135694 | -0.0987939266 |
| H    | -1.0646329930 | 3.8635100005  | 0.0493619832  |
| H    | 1.2913543250  | 3.1014082345  | 0.0080820147  |
| H    | 2.9516780995  | -3.1904984303 | -0.1907699698 |
| H    | 4.4521002352  | -2.9116692207 | -1.0785561239 |
| H    | 4.4749817562  | -2.9568138708 | 0.6715345918  |
| H    | 6.3501887332  | -1.1487117222 | -1.0438607598 |
| H    | 6.6950470766  | 0.3239434476  | -0.1406750384 |
| H    | 6.3672668085  | -1.1849482869 | 0.7069511641  |
| H    | -3.4931750238 | 3.2850887408  | 0.0403563186  |
| H    | -5.2442500010 | 1.5861449430  | -0.0130215406 |

**t-bipy (optimized at DFT (BP86) level)**

| ATOM | X             | Y             | Z            |
|------|---------------|---------------|--------------|
| C    | -1.1647569655 | 0.7804466853  | 0.0000000000 |
| N    | -0.0270871335 | 0.1125202888  | 0.0000000000 |
| C    | 1.1165444359  | 0.7694043481  | 0.0000000000 |
| C    | 1.1828769029  | 2.1557082363  | 0.0000000000 |
| C    | -0.0089314937 | 2.8587565169  | 0.0000000000 |
| C    | -1.2055950530 | 2.1718448266  | 0.0000000000 |
| C    | -2.4196179233 | -0.0292249112 | 0.0000000000 |
| N    | -3.5620676707 | 0.6393833731  | 0.0000000000 |
| C    | -4.6939149207 | -0.0377439917 | 0.0000000000 |
| C    | -4.7542606469 | -1.4195349325 | 0.0000000000 |
| C    | -3.5595025065 | -2.1190946090 | 0.0000000000 |
| C    | -2.3687364507 | -1.4194752945 | 0.0000000000 |
| H    | 2.1319672808  | 2.6522369615  | 0.0000000000 |
| H    | -0.0009766667 | 3.9342948901  | 0.0000000000 |
| H    | -2.1502767787 | 2.6769159331  | 0.0000000000 |
| H    | -5.5977054812 | 0.5474791053  | 0.0000000000 |
| H    | -5.7028004575 | -1.9242098535 | 0.0000000000 |
| H    | -3.5554600322 | -3.1949697699 | 0.0000000000 |
| H    | -1.4187316277 | -1.9153249071 | 0.0000000000 |
| C    | 2.3642808346  | -0.0533425581 | 0.0000000000 |
| N    | 3.5031232955  | 0.6027913525  | 0.0000000000 |
| N    | 4.6298111732  | -0.0571022358 | 0.0000000000 |
| C    | 4.5996096923  | -1.3617862542 | 0.0000000000 |
| C    | 3.3787817438  | -2.0372626896 | 0.0000000000 |
| N    | 2.2556510992  | -1.3817181874 | 0.0000000000 |
| H    | 5.5425419174  | -1.8750977448 | 0.0000000000 |
| H    | 3.3356645211  | -3.1128829717 | 0.0000000000 |

**t-phen (optimized at DFT (BP86) level)**

| ATOM | X             | Y             | Z            |
|------|---------------|---------------|--------------|
| C    | -4.2711857200 | 2.0926963552  | 0.0000000000 |
| C    | -4.4731209349 | 0.7442124439  | 0.0000000000 |
| C    | -3.3631178320 | -0.1194313497 | 0.0000000000 |
| C    | -2.0873508394 | 0.4595921012  | 0.0000000000 |
| N    | -1.9040030011 | 1.7858779959  | 0.0000000000 |
| C    | -2.9473648761 | 2.5617026322  | 0.0000000000 |
| C    | -3.5123527051 | -1.5511552083 | 0.0000000000 |
| C    | -0.9190805264 | -0.4152965038 | 0.0000000000 |
| C    | -1.1109023834 | -1.8027823738 | 0.0000000000 |
| C    | -2.4394375547 | -2.3543830255 | 0.0000000000 |
| C    | 0.0367268063  | -2.6146409495 | 0.0000000000 |
| H    | -0.0691928409 | -3.6855468373 | 0.0000000000 |
| C    | 1.2722161581  | -2.0415652401 | 0.0000000000 |
| C    | 1.3487250836  | -0.6334662186 | 0.0000000000 |
| N    | 0.2986752445  | 0.1337214427  | 0.0000000000 |
| H    | -4.5063945189 | -1.9630358712 | 0.0000000000 |
| H    | -5.0913917519 | 2.7867606637  | 0.0000000000 |
| H    | -5.4675895263 | 0.3323739833  | 0.0000000000 |
| H    | -2.7560920923 | 3.6219784917  | 0.0000000000 |
| H    | -2.5520862681 | -3.4242497528 | 0.0000000000 |
| H    | 2.1687737686  | -2.6272670724 | 0.0000000000 |
| C    | 2.6851348968  | 0.0390745350  | 0.0000000000 |
| N    | 2.7322866123  | 1.3709619924  | 0.0000000000 |
| C    | 3.9231195323  | 1.8899593628  | 0.0000000000 |
| C    | 5.0574465215  | 1.0748042273  | 0.0000000000 |
| N    | 4.9357408931  | -0.2234080429 | 0.0000000000 |
| N    | 3.7375093182  | -0.7464670340 | 0.0000000000 |
| H    | 4.0059571907  | 2.9632209376  | 0.0000000000 |
| H    | 6.0539345532  | 1.4746914436  | 0.0000000000 |

**Am(t-bipy)<sup>3+</sup> (optimized at DFT (BP86) level)**

| ATOM | X          | Y          | Z          |
|------|------------|------------|------------|
| C    | 0.0084332  | -0.0056225 | -0.0800238 |
| C    | -0.0130901 | -0.0049219 | 1.4007407  |
| C    | 1.1284895  | 0.0035580  | 2.2198398  |
| C    | 0.9810840  | 0.0151436  | 3.6218478  |
| C    | -0.3071471 | 0.0155018  | 4.1830389  |
| C    | -1.4054956 | 0.0002346  | 3.3103620  |
| N    | -1.2685068 | -0.0077078 | 1.9590643  |
| H    | 2.1395210  | 0.0066293  | 1.7858981  |
| H    | 1.8737960  | 0.0240622  | 4.2702808  |
| H    | -0.4668054 | 0.0192167  | 5.2739271  |
| H    | -2.4355056 | -0.0166942 | 3.7235037  |
| N    | -1.2093462 | 0.0057616  | -0.6955025 |
| C    | -1.2571323 | 0.0086667  | -2.0659403 |
| C    | -0.1137233 | 0.0031882  | -2.8762952 |
| C    | 1.1458282  | -0.0110250 | -2.2426701 |
| C    | 1.2046160  | -0.0155799 | -0.8438797 |
| C    | -2.6176075 | 0.0120027  | -2.6190061 |
| H    | -0.2139241 | 0.0033375  | -3.9745420 |
| H    | 2.0725512  | -0.0188253 | -2.8410109 |
| H    | 2.1850468  | -0.0244033 | -0.3439952 |
| N    | -2.9380057 | 0.0144961  | -3.9163490 |
| C    | -4.2166852 | 0.0155505  | -4.2634627 |
| C    | -5.2470753 | -0.0005551 | -3.2541348 |
| N    | -4.8673010 | 0.0056287  | -1.9790239 |
| N    | -3.5974642 | 0.0176772  | -1.6706637 |
| H    | -4.4775558 | 0.0251540  | -5.3419415 |
| H    | -6.3268177 | -0.0172657 | -3.4875070 |
| Am   | -3.2903493 | 0.0326267  | 0.6977650  |

**Eu(t-bipy)<sup>3+</sup> (optimized at DFT (BP86) level)**

| ATOM | X          | Y          | Z          |
|------|------------|------------|------------|
| C    | -0.0579460 | -0.0013787 | -0.0307271 |
| C    | -0.0465415 | 0.0033157  | 1.4519290  |
| C    | 1.1464728  | 0.0054120  | 2.2124256  |
| C    | 1.0854048  | 0.0111118  | 3.6180589  |
| C    | -0.1708270 | 0.0119218  | 4.2423387  |
| C    | -1.3220725 | 0.0052567  | 3.4256568  |
| N    | -1.2743518 | 0.0037897  | 2.0730869  |
| H    | 2.1318591  | 0.0029504  | 1.7241656  |
| H    | 2.0134847  | 0.0133094  | 4.2143030  |
| H    | -0.2747174 | 0.0092927  | 5.3402202  |
| H    | -2.3211130 | -0.0105974 | 3.9023676  |
| N    | -1.2785928 | 0.0068524  | -0.6429756 |
| C    | -1.3343550 | 0.0040063  | -2.0053611 |
| C    | -0.1892218 | -0.0066578 | -2.8259560 |
| C    | 1.0717060  | -0.0175990 | -2.2028813 |
| C    | 1.1375450  | -0.0124527 | -0.8039131 |
| C    | -2.6869615 | 0.0113313  | -2.5950538 |
| H    | -0.2956716 | -0.0233816 | -3.9231643 |
| H    | 1.9952403  | -0.0311878 | -2.8058164 |
| H    | 2.1228180  | -0.0109036 | -0.3152608 |
| N    | -2.9095659 | 0.0257960  | -3.9130611 |
| C    | -4.1463817 | 0.0407326  | -4.3771854 |
| C    | -5.2491591 | -0.0244771 | -3.4536438 |
| N    | -4.9682765 | -0.0053047 | -2.1557811 |
| N    | -3.7397413 | 0.0362040  | -1.7189906 |
| H    | -4.3146693 | 0.0850088  | -5.4733696 |
| H    | -6.3062028 | -0.0894712 | -3.7701158 |
| Eu   | -3.3483343 | 0.0629554  | 0.7590245  |

**Am(t-phen)<sup>3+</sup> (optimized at DFT (BP86) level)**

| ATOM | X          | Y          | Z          |
|------|------------|------------|------------|
| N    | -2.8082126 | 0.0116666  | -1.3706617 |
| C    | -1.8222658 | 0.0229983  | -2.3101139 |
| N    | -2.0978338 | 0.0387896  | -3.6179173 |
| C    | -3.3777637 | 0.0382442  | -3.9816650 |
| C    | -4.4171938 | -0.0330155 | -2.9938180 |
| N    | -4.0814214 | -0.0404565 | -1.7027746 |
| C    | -0.4579184 | 0.0175938  | -1.7483811 |
| N    | -0.4204633 | 0.0000678  | -0.3854739 |
| C    | 0.7864212  | -0.0172181 | 0.2409646  |
| C    | 2.0257409  | -0.0285590 | -0.4906153 |
| C    | 1.9522464  | -0.0063739 | -1.9117600 |
| C    | 0.7044062  | 0.0308872  | -2.5458990 |
| C    | 0.8010460  | -0.0057081 | 1.6896904  |
| C    | 2.0484113  | -0.0211485 | 2.3851474  |
| C    | 2.0124929  | -0.0113490 | 3.8116896  |
| C    | 0.7792831  | 0.0264049  | 4.4677138  |
| C    | -0.4024735 | 0.0581077  | 3.6996868  |
| N    | -0.4039666 | 0.0269378  | 2.3430421  |
| H    | 2.9532142  | -0.0259084 | 4.3885270  |
| H    | 0.7143175  | 0.0409562  | 5.5679148  |
| H    | -1.3826379 | 0.1112564  | 4.2101373  |
| H    | 0.6134241  | 0.0597544  | -3.6440098 |
| H    | 2.8776007  | -0.0183740 | -2.5124255 |
| H    | -3.6170944 | 0.0767095  | -5.0629416 |
| H    | -5.4903962 | -0.0879759 | -3.2485733 |
| C    | 3.2633318  | -0.0364937 | 0.2373272  |
| C    | 3.2733092  | -0.0422714 | 1.6299378  |
| H    | 4.2149624  | -0.0248617 | -0.3198668 |
| H    | 4.2346788  | -0.0549291 | 2.1708062  |
| Am   | -2.4752451 | -0.1057319 | 1.0043118  |

**Eu(t-phen)<sup>3+</sup> (optimized at DFT (BP86) level)**

| ATOM | X          | Y          | Z          |
|------|------------|------------|------------|
| N    | -2.8839422 | -0.0035110 | -1.3919673 |
| C    | -1.8581745 | 0.0133348  | -2.2913742 |
| N    | -2.0808511 | 0.0432558  | -3.6096952 |
| C    | -3.3365420 | 0.0505202  | -4.0403486 |
| C    | -4.4157755 | -0.0404977 | -3.1004731 |
| N    | -4.1335766 | -0.0562292 | -1.7980571 |
| C    | -0.4951759 | 0.0118972  | -1.7141985 |
| N    | -0.4452249 | -0.0024747 | -0.3529281 |
| C    | 0.7618478  | -0.0172575 | 0.2640718  |
| C    | 1.9949139  | -0.0281786 | -0.4811041 |
| C    | 1.9115234  | -0.0039729 | -1.9024125 |
| C    | 0.6592016  | 0.0320574  | -2.5248532 |
| C    | 0.7957865  | -0.0069548 | 1.7232011  |
| C    | 2.0596285  | -0.0225574 | 2.3962003  |
| C    | 2.0599073  | -0.0058225 | 3.8237242  |
| C    | 0.8421715  | 0.0337504  | 4.5064033  |
| C    | -0.3530341 | 0.0533667  | 3.7597721  |
| N    | -0.3895692 | 0.0246713  | 2.4031161  |
| H    | 3.0149969  | -0.0183384 | 4.3764263  |
| H    | 0.8003288  | 0.0535777  | 5.6076828  |
| H    | -1.3218820 | 0.0941933  | 4.2910582  |
| H    | 0.5587836  | 0.0623676  | -3.6218157 |
| H    | 2.8324243  | -0.0166662 | -2.5098118 |
| H    | -3.5246727 | 0.1042877  | -5.1313306 |
| H    | -5.4765155 | -0.1075617 | -3.4015295 |
| C    | 3.2405927  | -0.0414543 | 0.2264214  |
| C    | 3.2700492  | -0.0460181 | 1.6256093  |
| H    | 4.1860949  | -0.0350748 | -0.3416052 |
| H    | 4.2404865  | -0.0573900 | 2.1506243  |
| Eu   | -2.5138013 | -0.0673204 | 1.0591936  |



**H(t-bipy)<sup>+</sup> (optimized at HF-level)**

| ATOM | X             | Y             | Z            |
|------|---------------|---------------|--------------|
| C    | -1.2168679435 | 0.9731358562  | 0.0000000000 |
| N    | -0.0520333098 | 0.3235365754  | 0.0000000000 |
| C    | 1.1495176152  | 0.9141750017  | 0.0000000000 |
| C    | 1.2249540324  | 2.2830506577  | 0.0000000000 |
| C    | 0.0335795119  | 3.0034942551  | 0.0000000000 |
| C    | -1.1882005002 | 2.3584828230  | 0.0000000000 |
| C    | -2.4300548877 | 0.1139192211  | 0.0000000000 |
| N    | -2.1673537540 | -1.1853438316 | 0.0000000000 |
| C    | -3.1669544491 | -2.0368155759 | 0.0000000000 |
| C    | -4.4968920492 | -1.6286787075 | 0.0000000000 |
| C    | -4.7691261150 | -0.2775021591 | 0.0000000000 |
| C    | -3.7131434945 | 0.6252971409  | 0.0000000000 |
| H    | 2.1818946585  | 2.7638427935  | 0.0000000000 |
| H    | 0.0648045511  | 4.0777138594  | 0.0000000000 |
| H    | -2.0980482626 | 2.9225515298  | 0.0000000000 |
| H    | -2.9105941039 | -3.0804986564 | 0.0000000000 |
| H    | -5.2852692154 | -2.3573301672 | 0.0000000000 |
| H    | -5.7827912256 | 0.0786498977  | 0.0000000000 |
| H    | -3.9068817842 | 1.6800315531  | 0.0000000000 |
| C    | 2.3335258380  | 0.0159372130  | 0.0000000000 |
| N    | 2.0784990703  | -1.2611384047 | 0.0000000000 |
| N    | 3.0746941781  | -2.1098961137 | 0.0000000000 |
| C    | 4.2916027942  | -1.6410618472 | 0.0000000000 |
| C    | 4.5313261815  | -0.2587024871 | 0.0000000000 |
| N    | 3.5348299320  | 0.5794522126  | 0.0000000000 |
| H    | 5.0904205020  | -2.3575123358 | 0.0000000000 |
| H    | 5.5304488744  | 0.1377769847  | 0.0000000000 |
| H    | -0.0959874058 | -0.6862907789 | 0.0000000000 |

**H(t-phen)<sup>+</sup> (optimized at HF-level)**

| ATOM | X             | Y             | Z            |
|------|---------------|---------------|--------------|
| C    | -4.1329130361 | 2.1531650550  | 0.0000000000 |
| C    | -4.4166379893 | 0.8202540764  | 0.0000000000 |
| C    | -3.3524913818 | -0.1073139795 | 0.0000000000 |
| C    | -2.0661832752 | 0.4242702325  | 0.0000000000 |
| N    | -1.7873661887 | 1.7337671920  | 0.0000000000 |
| C    | -2.7842831652 | 2.5679464743  | 0.0000000000 |
| C    | -3.5425089194 | -1.5355755659 | 0.0000000000 |
| C    | -0.9561009491 | -0.4885944205 | 0.0000000000 |
| C    | -1.1507096133 | -1.8684517749 | 0.0000000000 |
| C    | -2.4961676365 | -2.3784498548 | 0.0000000000 |
| C    | -0.0043842039 | -2.6791443868 | 0.0000000000 |
| H    | -0.1165906653 | -3.7485854919 | 0.0000000000 |
| C    | 1.2579440225  | -2.1300968077 | 0.0000000000 |
| C    | 1.3849433511  | -0.7480543058 | 0.0000000000 |
| N    | 0.2958573282  | 0.0054915797  | 0.0000000000 |
| H    | -4.5466954911 | -1.9185388363 | 0.0000000000 |
| H    | -4.9142598216 | 2.8894661408  | 0.0000000000 |
| H    | -5.4334732251 | 0.4710534245  | 0.0000000000 |
| H    | -2.5424548784 | 3.6157675460  | 0.0000000000 |
| H    | -2.6439106942 | -3.4424714799 | 0.0000000000 |
| H    | 2.1409602120  | -2.7358727694 | 0.0000000000 |
| C    | 2.6934133978  | -0.0432784573 | 0.0000000000 |
| N    | 3.7940555320  | -0.7831134081 | 0.0000000000 |
| C    | 4.9073302476  | -0.1065355787 | 0.0000000000 |
| C    | 4.8808063355  | 1.2954593575  | 0.0000000000 |
| N    | 3.7488723796  | 1.9449055084  | 0.0000000000 |
| N    | 2.6359881679  | 1.2584843300  | 0.0000000000 |
| H    | 5.8341867316  | -0.6508351882 | 0.0000000000 |
| H    | 5.7791647929  | 1.8822482668  | 0.0000000000 |
| H    | 0.3978518889  | 1.0093712805  | 0.0000000000 |

**Valence level occupied molecular orbitals of the  $\text{Am}^{3+}$  and  $\text{Eu}^{3+}$   
complexes of t-bipy and t-phen**

| <b>Orbital</b> | <b><math>\text{Am}(\text{t-bipy})^{3+}</math></b>                                   | <b><math>\text{Eu}(\text{t-bipy})^{3+}</math></b>                                     |
|----------------|-------------------------------------------------------------------------------------|---------------------------------------------------------------------------------------|
| <b>HOMO</b>    | 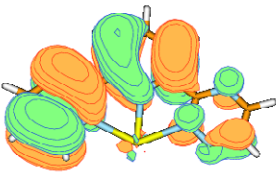   |    |
| <b>HOMO-1</b>  |    |     |
| <b>HOMO-2</b>  |   |   |
| <b>HOMO-3</b>  |  |  |
| <b>HOMO-4</b>  |  |   |
| <b>HOMO-5</b>  |  |   |

| Orbital | $\text{Am}(\text{t-phen})^{3+}$                                                     | $\text{Eu}(\text{t-phen})^{3+}$                                                      |
|---------|-------------------------------------------------------------------------------------|--------------------------------------------------------------------------------------|
| HOMO    | 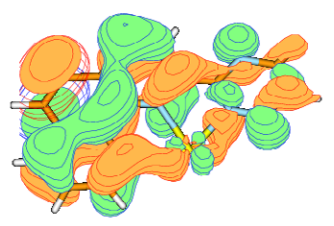   |    |
| HOMO-1  |    |    |
| HOMO-2  |   |   |
| HOMO-3  |  |  |
| HOMO-4  |  |  |
| HOMO-5  |  |  |
